# Supplementary material for: Mental Health Outcomes among Electricians and Plumbers in Ontario, Canada: Analysis of Burnout and Work-Related Factors
Source: MDPI journal article supplement (doi:10.3390/bs12120505), 2022-12-12
Supplement: s1 [file s1]

Table S1. Association between availability of work-related factors to satisfaction of the participants and average burnout (n=40)

| Factors                                                              | Satisfied with availability of work-related factors (%) | SE of percent of satisfied | Personal burnout |               |           |         | Work-related burnout |               |         |         | Colleague-related burnout |      |         |         |
|----------------------------------------------------------------------|---------------------------------------------------------|----------------------------|------------------|---------------|-----------|---------|----------------------|---------------|---------|---------|---------------------------|------|---------|---------|
|                                                                      |                                                         |                            | Mean difference* | SE difference | Z value** | P value | Mean difference      | SE difference | Z value | P value | Mean difference           | SE   | Z value | P value |
| Career advancement possibility                                       | 68                                                      | 7.3                        | 2.70             | 5.91          | -0.35     | 0.72    | 3.26                 | 4.78          | -0.27   | 0.78    | 1.55                      | 5.85 | -0.32   | 0.74    |
| Effective management                                                 | 69                                                      | 7.3                        | -1.22            | 7.03          | -0.10     | 0.91    | 0.73                 | 4.98          | -0.05   | 0.95    | 5.03                      | 6.06 | -0.97   | 0.33    |
| Facility and workplace equipment/resources                           | 62                                                      | 7.6                        | -5.62            | 5.72          | -1.04     | 0.29    | -1.55                | 4.63          | -0.58   | 0.55    | 1.65                      | 5.65 | -0.36   | 0.71    |
| Financial support for external training                              | 51                                                      | 7.9                        | -2.01            | 5.75          | -0.59     | 0.55    | 7.07                 | 4.46          | -1.01   | 0.30    | 15.63                     | 5.11 | -2.73   | 0.006   |
| Flexible scheduling for external training                            | 72                                                      | 7.0                        | 3.24             | 6.22          | -0.23     | 0.81    | 9.49                 | 4.76          | -1.16   | 0.24    | 10.26                     | 6.04 | -1.51   | 0.12    |
| Flexible scheduling for family commitments                           | 75                                                      | 6.8                        | -0.12            | 6.46          | -0.12     | 0.89    | 2.46                 | 5.19          | -0.14   | 0.88    | -0.21                     | 6.51 | -0.09   | 0.92    |
| Full-time employment opportunity                                     | 86                                                      | 5.4                        | -2.40            | 8.08          | -0.41     | 0.67    | 4.50                 | 6.47          | -0.09   | 0.92    | -3.19                     | 8.13 | -0.48   | 0.62    |
| Internal staff development opportunity                               | 58                                                      | 7.8                        | 0.82             | 5.67          | -0.06     | 0.94    | 3.33                 | 4.54          | -0.87   | 0.38    | 4.51                      | 5.66 | -1.15   | 0.25    |
| Involvement in organization decision-making                          | 72                                                      | 7.0                        | 2.08             | 6.24          | -0.44     | 0.65    | 1.58                 | 5.03          | -0.37   | 0.70    | -0.12                     | 6.29 | -0.16   | 0.87    |
| Leave of absence for external training                               | 64                                                      | 7.5                        | -2.96            | 5.80          | -0.54     | 0.58    | 1.48                 | 4.69          | -0.33   | 0.73    | 4.51                      | 5.82 | -1.06   | 0.28    |
| Orientation program for new staff                                    | 53                                                      | 7.8                        | 0.17             | 5.61          | -0.01     | 0.98    | 6.16                 | 4.39          | -1.23   | 0.21    | 7.22                      | 5.51 | -1.29   | 0.19    |
| Peer support                                                         | 56                                                      | 7.8                        | 0.72             | 5.63          | -0.06     | 0.94    | 4.30                 | 4.48          | -0.45   | 0.65    | 1.51                      | 5.67 | -0.49   | 0.61    |
| Salary and benefits                                                  | 60                                                      | 7.7                        | 2.30             | 5.81          | -0.15     | 0.87    | 5.23                 | 4.61          | -0.64   | 0.51    | 5.07                      | 5.42 | -0.85   | 0.39    |
| Stable staffing/minimal turnover                                     | 58                                                      | 7.8                        | 3.20             | 5.65          | -0.46     | 0.64    | 6.11                 | 4.45          | -0.97   | 0.33    | 10.23                     | 5.44 | -1.80   | 0.07    |
| Workload allocation                                                  | 61                                                      | 7.7                        | 4.82             | 5.68          | -0.58     | 0.55    | 5.51                 | 4.53          | -0.75   | 0.45    | 7.18                      | 5.65 | -1.34   | 0.17    |
| Workplace safety                                                     | 71                                                      | 7.1                        | 6.91             | 5.88          | -0.91     | 0.35    | 7.16                 | 4.90          | -0.83   | 0.40    | 6.10                      | 6.25 | -1.12   | 0.26    |
| Opportunity to become a fully licensed electrician (For apprentices) | 81                                                      | 6.2                        | -4.41            | 7.36          | -0.40     | 0.68    | 5.70                 | 6.21          | -0.30   | 0.76    | 3.37                      | 7.55 | -0.20   | 0.83    |
| Opportunity/support to qualify as Master Electrician                 | 69                                                      | 7.3                        | 4.10             | 6.06          | -0.51     | 0.60    | 9.19                 | 4.93          | -0.98   | 0.32    | 3.23                      | 6.28 | -0.57   | 0.56    |

\*Difference in average burnout score between those who were unsatisfied with the availability of the factors and those who were satisfied with. Positive values indicate that unsatisfied participants with availability of the factors had higher level of burnout.

\*\*Mann–Whitney U test.

Table S2. Association between the importance of work-related factors and burnout in the study participants (n=40)

| Factors                                     | Recognized as important factor (%) | SE of recognized important factors (%) | Personal burnout |               |         |         | Work-related burnout |               |         |             | Colleague-related burnout |               |         |         |
|---------------------------------------------|------------------------------------|----------------------------------------|------------------|---------------|---------|---------|----------------------|---------------|---------|-------------|---------------------------|---------------|---------|---------|
|                                             |                                    |                                        | Mean difference  | SE difference | Z value | P value | Mean difference      | SE difference | Z value | P value     | Mean difference           | SE difference | Z value | P value |
| Career advancement possibility              | 59                                 | 8.2                                    | 11.96            | 5.18          | -2.25   | 0.02    | 11.55                | 4.02          | -2.45   | <b>0.01</b> | 9.25                      | 5.45          | -1.59   | 0.11    |
| Cost of Living                              | 84                                 | 6.1                                    | 2.22             | 7.40          | -0.35   | 0.72    | 6.67                 | 5.84          | -0.52   | 0.60        | -4.87                     | 7.51          | -0.93   | 0.48    |
| Existing leadership                         | 73                                 | 7.4                                    | 4.69             | 6.10          | -0.77   | 0.43    | 8.09                 | 4.74          | -1.65   | 0.09        | 0.87                      | 6.27          | -0.19   | 0.84    |
| Facility and workplace equipment/resources  | 70                                 | 7.6                                    | 0.05             | 6.04          | -0.15   | 0.88    | 4.74                 | 4.73          | -1.87   | 0.06        | 0.75                      | 6.09          | -0.20   | 0.84    |
| Family commitments                          | 92                                 | 4.5                                    | -14.14           | 9.72          | -1.28   | 0.19    | -10.10               | 7.85          | -1.60   | 0.10        | -18.79                    | 9.69          | -2.28   | 0.02    |
| Financial support for external training     | 57                                 | 8.3                                    | -4.54            | 5.46          | -1.11   | 0.26    | 3.51                 | 4.39          | -0.68   | 0.49        | -0.15                     | 5.62          | -0.38   | 0.69    |
| Flexible scheduling for external training   | 69                                 | 8.0                                    | 0.44             | 6.17          | -0.07   | 0.94    | 7.47                 | 4.76          | -1.65   | 0.09        | 2.75                      | 6.26          | -0.07   | 0.94    |
| Full-time employment opportunity            | 76                                 | 7.2                                    | 6.32             | 6.28          | -0.97   | 0.32    | 7.23                 | 4.96          | -1.46   | 0.14        | 1.03                      | 6.49          | -0.26   | 0.78    |
| Income and benefits                         | 95                                 | 3.8                                    | -13.73           | 11.85         | -0.87   | 0.38    | -8.55                | 9.59          | -0.98   | 0.32        | -18.26                    | 11.92         | -1.83   | 0.06    |
| Internal staff development opportunity      | 68                                 | 7.8                                    | 1.01             | 5.83          | -0.44   | 0.66    | 3.08                 | 4.65          | -1.27   | 0.20        | -4.49                     | 5.90          | -0.85   | 0.39    |
| Involvement in organization decision-making | 83                                 | 6.0                                    | -6.38            | 7.43          | -0.66   | 0.50    | -2.12                | 6.01          | -0.02   | 0.98        | -4.63                     | 7.52          | -0.98   | 0.32    |
| Leave of absence for external training      | 49                                 | 8.3                                    | -3.54            | 5.43          | -0.62   | 0.53    | -0.72                | 4.38          | -0.59   | 0.55        | -8.01                     | 5.40          | -1.61   | 0.10    |
| Orientation program for new staff           | 68                                 | 7.8                                    | 0.50             | 5.84          | -0.29   | 0.76    | 6.07                 | 4.57          | -1.35   | 0.17        | -3.46                     | 5.92          | -0.93   | 0.34    |
| Peer support                                | 73                                 | 7.4                                    | -3.30            | 6.13          | -0.48   | 0.63    | 1.72                 | 4.93          | -0.74   | 0.45        | 4.30                      | 6.22          | -0.41   | 0.67    |
| Stable staffing/minimal turnover            | 86                                 | 5.7                                    | -8.85            | 7.85          | -0.98   | 0.32    | -1.92                | 6.41          | -0.24   | 0.80        | -2.63                     | 8.13          | -0.85   | 0.39    |

|                                                      |    |     |       |      |       |      |       |      |       |      |       |      |       |      |
|------------------------------------------------------|----|-----|-------|------|-------|------|-------|------|-------|------|-------|------|-------|------|
| Workload allocation                                  | 81 | 6.5 | -3.25 | 6.95 | -0.13 | 0.89 | -3.06 | 5.80 | -0.25 | 0.79 | -6.62 | 7.02 | -1.37 | 0.16 |
| Workplace Safety                                     | 86 | 5.7 | -7.31 | 7.90 | -0.73 | 0.46 | -4.40 | 6.37 | -0.67 | 0.50 | -6.48 | 8.07 | -1.17 | 0.24 |
| Opportunity to become a fully licensed Electrician   | 65 | 8.7 | 0.68  | 6.16 | -0.14 | 0.88 | 8.54  | 6.11 | -0.85 | 0.39 | 7.54  | 6.10 | -0.94 | 0.34 |
| Opportunity/support to qualify as Master Electrician | 61 | 8.9 | 3.94  | 5.91 | -0.50 | 0.61 | 9.60  | 4.71 | -1.22 | 0.21 | 8.00  | 5.90 | -1.08 | 0.27 |
